# Supplementary material for: Ameliorating the Metabolic Burden of the Co-expression of Secreted Fungal Cellulases in a High Lipid-Accumulating Yarrowia lipolytica Strain by Medium C/N Ratio and a Chemical Chaperone
Source: PubMed Central journal article supplement (PMC6333634; doi:10.3389/fmicb.2018.03276), 2019-01-09
Supplement: Data_Sheet_1.pdf [file Data_Sheet_1.pdf]

**Ameliorating the metabolic burden of the co-expression of secreted fungal cellulases in a high lipid-accumulating *Yarrowia lipolytica* strain by medium C/N ratio and a chemical chaperone**

**Additional file 1:**

**File type:** .pdf

**List of contents:**

|                                                                                                                                                                                                  | <b>Page no.</b> |
|--------------------------------------------------------------------------------------------------------------------------------------------------------------------------------------------------|-----------------|
| <b>Supplementary Materials and Methods</b>                                                                                                                                                       | 2               |
| <b>Supplementary Table S1.</b> Primer sequences for real-time RT PCR                                                                                                                             | 5               |
| <b>Supplementary Figure S1.</b> Growth of <i>Y. lipolytica</i> transformants for co-expressing CBH I, CBH II, and EG II on PASC-YPD agar plate                                                   | 6               |
| <b>Supplementary Figure S2.</b> Transcript levels relative to YL165-1 for CBH I-CBH II-EG II co-expressed in <i>Y. lipolytica</i> transformants YL165-1, -5, -6, -7, and -8.                     | 7               |
| <b>Supplementary Figure S3.</b> Effects of concentrated crude enzymes from transformant YL165-1 on the morphology of wet ball-dispersed Avicel particles                                         | 8               |
| <b>Supplementary Figure S4:</b> The timeline profiling of cell mass weight of <i>Y. lipolytica</i> transformants expressing multiple cellulases and the control strain HA1 (EV) in shake flasks. | 9               |
| <b>Supplementary Figure S5.</b> Floating cell mats of <i>Y. lipolytica</i> HA1 (EV) and transformant YL165-1.                                                                                    | 10              |

## Supplementary Materials and Methods

### Nucleotide sequences of the cellulase expression cassettes of construct 162.

Note that the nucleotide sequence ((length: 7780 bp) was codon-optimized based on the codon bias of *Y. lipolytica*, with the SalI site (GTCGAC) and PmlI site (CACGTG) at the 5' end, and the KpnI site (GGTACC) at the 3' end for cloning into the vector pUC57 and pYLEX (see the Methods section for details).

>pNREL162\_construct\_CBH I-CBH II-EG II

```
GTCGACCACGTGAGAGACCGGGTTGGCGGCGCATTTGTGTCCCAAAAAACAGCCCCAATTGCCCAAT
TGACCCCAAATTGACCCAGTAGCGGGCCCAACCCCGGCGAGAGCCCCCTTCTCCCACATATCAAACC
TCCCCCGTTCCACACTTGCCGTTAAGGGCGTAGGGTACTGCAGTCTGGAATCTACGCTTGTTCAGAC
TTTGTACTAGTTTCTTTGTCTGGCCATCCGGGTAACCCATGCCGGACGAAAATAGACTACTGAAAATT
TTTTTGTCTTGTGGTTGGGACTTTAGCCAAGGGTATAAAAAGACCACCGTCCCCGAATTACCTTTCCTCT
TCTTTTCTCTCTCCTTGTCAACTCACACCCGAAATCGTTAAGCATTTCCTTCTGAGTATAAGAATCAT
TCAAATGGTGAGTTTCAGAGGCAGCAGCAATTGCCACGGGCTTTGAGCACACGGCCGGGTGTGGTCC
CATTCCCATCGACACAAGACGCCACGTCATCCGACCAGCACTTTTTGCAGTACTAACCGCAGAAGCTC
GCTACCGCCTTTACTATTCTCACGGCCGTTCTGGCCAGCAGGCAGGGACCGCTACCGCCGAGAACCA
TCCTCCCTCACCTGGCAGGAGTGCACCGCACCCGGATCCTGCACCACGCAGAACGGCGCTGTCGTGC
TGGACGCAAATTGGCGATGGGTTACGATGTGAACGGGTACACTAACTGCTATACAGGCAACACATGG
GATCCTACCTACTGCCCCGACGACGAAACATGTGCCAGAACTGTGCCCTTGACGGAGCTGACTACGA
GGAACTACGGGGTACCTCGTCCGGGAGCAGTCTCAAGCTCAACTTTGTGACCGGTTCAAACGTCG
GTTACGGCTCTATCTGCTCCAGGACGACTCGACCTACCAGATCTTCAAACGTTGAACCGAGAGTTCT
CGTTTGACGTTGATGTTTCGAACTTGCCTTGGGACTTAATGGTGCTCTGTACTTTGTTGCAATGGATG
CTGACGGCGGAGTCTCTAAGTACCCCAACAACAAGGCTGGTGCCAAGTACGGTACGGGCTATTGTGAC
AGTCAGTGCCCTAGAGATCTAAAATTCATTGATGGCGAGGCCAACGTCGAGGGCTGGCAACCGAGCA
GCAATAACGCCAATACTGGAATCGGCGACCACGGCTCCTGTTGCGCGGAGATGGACGTGTGGGAAGC
GAACTCCATTAGTAATGCTGTAACACCCCATCCGTGCGACACTCCGGGACAGACGATGTGTTCCGGTG
ACGATTGTGGCGGCACCTACTCCAACGATCGATACGCGGGTACATGCGATCCCGACGGCTGCGATTTT
AACCCATACCGGATGGGTAATACATCCTTCTATGGACCAGGTAAGATTATCGACACTACGAAGCCTTT
CACCGTGGTCACGCAGTTTTTGTACAGATGACGGCACTGATACCGGAACCCTTTGGAATCAAGCGCT
TTTACATCCAGAACTCTAATGTTATTCCCAACCCAACAGTGACATTTCCGGAGTTACTGGAACTCTA
TCACTACAGAGTTTTGTACAGCCAAAAGCAGGCCTTCGGGGACACCGACGACTTTTCTCAGCACGGA
GGCCTGGCCAAAATGGGAGCTGCCATGCAACAGGGAATGGTGCTTGTCTGTGTTGGGATGACTA
CGCCGCTCAAATGCTGTGGCTGGACTCTGACTACCCACTGATGCCGATCCAACCTACCCCTGGCATCGC
CAGAGGTAAGTGTCCACCGACAGCGGCGTGGCCTCCGACGTAGAGTCCAGTCGCCAACAGCTATG
TGACGTAAGTGTCCGACATTAAGTTCGGCCCTATCAACTCTACGTTACCGCATCTAACCCACTGGTGGTA
ACCGAGGTAAGTGTCCGACACTCGACGTCCTGCTACTACCACTGGTTCGTCACCCGGACCCACCCAGTCTC
ACTACGGACAGTGTGGCGGAATTGGATACTCTGGTCCCACCGTGTGTGCGTCTGGAACCTACCTGTCAG
GTCTCAACCTTACTACTCCCAATGCCTGTAATAGGCAATTAACAGATAGTTTGCCGGTGATAATTCT
CTTAACCTCCCACACTCCTTTGACATAACGATTTATGTAACGAAACTGAAATTTGACCAGATATTGTTG
TAAATAGAAAATCTGGCTTGTAGGTGGCAAAAATGCGGCGTCTTTGTTTCATCAATTCCCTCTGTGACTAC
TCGTCATCCCTTATGTTTCGACTGTCGATTTTCTTATTTCCATACATATGCAAGTGAGATGCCCGTGTG
CGAATTCGACGCAGTAGGATGTCTGCACGGGTCTTTTTGTGGGGTGTGGAGAAAGGGGTGCTTGGAG
ATGGAAGCCGGTAGAACCGGGCTGCTTGTGCTTGGAGATGGAAGCCGGTAGAACCGGGCTGCTTGGG
GGGATTTGGGGCCGCTGGGCTCCAAAGAGGGGTAGGCATTTTCGTTGGGGTTACGTAATTGCGGCATTT
GGTCTCTCGCGCATGTTCCCATTTGGTCCGAGATTAGTCCGGATAGGAGACTTATCAGCCAATCACAGCG
CCGATCCACCTGTAGTTGGTTGGTGGGAGCACCCTCCACAGAGTAGAGTCAAACAGCAGCAGC
CAACATGATAGTTGGGGTGTGCGTGTAAAGGAAAAAAGAAGCTTGGGTTATATTCCCGCTCTAT
TTAGAGGTTGCGGGATAGACGCCGACGGAGGGCAATGGCGCCATGGAACCTTGGGATATCGATACG
CCGCGGCGGACTGCGTCCGAACCAGCTCCAGCAGCGTTTTTTCCGGGCCATTGAGCCGACTGCGACCC
CGCCAACGTGTCTTGGCCACGCACTCATGTTCATGTTGGTGTGGGAGGCCACTTTTTAAGTAGCACAA
GGCACCTAGCTCGCAGCAAGGTGTCCGAACCAAGAAGCGGCTGCAGTGGTGCAAACGGGGCGGAA
CGGCGGGAAGCCACGGGGGCACGAATTGAGGCACGCCCTCGAATTTGAGACGAGTCACGGCCCC
ATTGCCCCGCGCAATGGCTCGCCAACGCCCGGCTTTTTGACCACATCAGGTTACCCCAAGCCAAACC
TTTTGTGTTAAAAGCTTAACATATTATACCGAACGTAGGTTTGGGCGGGCTTGCTCCGTCTGTCCAAG
```

CAACATTTATATAAGGGTCTGCATCGCCGGCTCAATTGAATCTTTTTTCTTCTTCTTCTCTATATTCA  
TTCTTGAATTAACACACATCAACATGAAGCTCGCTACCGCCTTACTATTCTCACGGCCGTTCTGGCC  
CAGGCGTGCAGTAGTGTGGGGCCAGTGGGTGGTCAAAACTGGTCTGGCCCCACTTGCTGTGCTTC  
TGGTTCGACCTGTGTTTACTCGAACGATTACTACTCTCAATGCCTGCCGGGAGCTGCCAGCTCCAGTTC  
ATCCACGAGAGCCGCTCTACAACATCACGAGTGTCCCTACGACCTCTCGCTCATCGAGCGCAACTC  
CTCCCCCTGGGTCTACCACAACCCGGTCCCACCTGTGGGATCGGGAAGTCCACGTACTCCGGCAAT  
CCTTTTGTGGGCGTGACACCTTGGGCAAACGCCTACTACGCTAGTGAAGTGTGCTCGCTGGCCATTCCC  
TCTCTCACTGGAGCTATGGCAAACGGCTGCCGCTGCCGTGCGCAAAGGTCCCCTCCTTTCATGTGGCTGGAC  
ACTCTTGATAAGACCCCACTCATGGAGCAAACCTCTGGCAGACATTGGAAGTCCGAAACAAAACGGTGG  
TAACTACGCCGGACAGTTCGTGGTCTATGACCTTCCCGACAGAGACTGCGCTGCCCTGGCCTCTAACG  
GCGAATATTCTATTGCGGATGGAGGGGTGCGCAAGTACAAAACCTATATTGACACGATCCGGCAGATC  
GTCGTTGAGTACTCTGACATCCGTACCCTCCTCGTCATCGAGCCCGATTCCCTTGGCAAACCTTGGTTACC  
AACCTGGGTACACCTAAGTGTGCAAACGCCAGTCTGCTTACCTGGAGTGTATTAACCTATGCTGTTACC  
CAACTGAACCTCCCAATGTCGCCATGTACCTCGATGCTGGACACGCCGGTGGCTGGGGTGGCCTGC  
TAATCAGGACCCCGTCTCAGCTTTTCGCTAATGTATACAAAACGCTTCTCCCCCAGGGCCCTTCG  
AGGACTCGCCACTAACGTTGCCAACTACAACGGTTGGAACATTACCTCTCCCCATCTACACCCAGG  
GTAACGCAGTGATAACGAGAAGCTGTACATCCATGCTATCGGACCCCTGCTCGCCAATCATGGATGG  
AGCAACGCCTTTTTCATCACCGACCAGGGCCGATCGGGCAAGCAGCCACCGGCCAGCAGCAGTGGG  
GCGATTGGTGAATGTGATCGGAACCGGTTTCGGTATTTCGTCCATCTGCCAATACAGGCGATTCCCTGC  
TCGACTATTTGTGTGGGTCAAGCCTGGCGGAGAGTGTGACGGCACCTCGGACAGCTCCGCTCCGCGA  
TTCGATAGCCACTGCGCACTGCCGGACGCTTTCAGCCCGCTCCTCAGGCCGGAGCGTGGTTCCAAGC  
CTACTTTGTGAGCTATTGACTAACGCCAACCCCTCGTTTCTATGATAAGCTATTTATCACTCTTTACAA  
CTTCTACCTCAACTATCTACTTTAATAAATGAATATCGTTTATTCTCTATGATTACTGTATATGCGTTCC  
TCTAAGACAAATCGAAACCAGCATGCGATCGAATGGCATACAAAAGTTTCTTCCGAAGTTGATCAATG  
TCCTGATAGTCAGGAGCTTGAGAAGATTGACACAGGTGGAGGCCGTAGGGAACCGATCAACCTGTCT  
ACCAGCGTTACGAATGGCAAATGACGGGTTCAAAGCCTTGAATCCTTGAATGGTGCCTTGGATACTG  
ATGTCACAAACTTAAGAAGCAGCCGCTTGTCTCTCCTCGAAACTGAGTTTGGCGCCCGTTTTTTTCGA  
GCCCCACACGTTTCGGTGAGTATGAGCGGCGGCAGATTTCGAGCGTTTCCGGTTTCCGCGGCTGGACGA  
GAGCCCATGATGGGGGCTCCCACCACCAGCAATCAGGGCCCTGATTACACACCACCTGTAATGTCAT  
GCTGTTTCATCGTGGTTAATGCTGCTGTGTGCTGTGTGTGTGTTGTTTGGCGCTCATTGTTGCGTTATG  
CAGCGTACACCACAATATTGGAAGCTTATTAGCCTTCTATTTTTTTCGTTTGCAAGGCTTAACAACATT  
GCTGTGGAGAGGGATGGGGATATGGAGGCCGCTGGAGGGAGTCCGAGAGGCGTTTTTGGAGCGGCTTG  
GCCTGGCGCCCAGCTCGCGAAACGCACCTAGGACCCTTTGGCACGCCGAAATGTGCCACTTTTCAGTC  
TAGTAACGCCTTACCTACGTCATTCCATGCATGCATGTTTGCGCCTTTTTTCCCTTGGCCTTGTATCGCCA  
CACAGTACAGTGCAGTGTACAGTGGAGGTTTTGGGGGGTCTTAGATGGGAGCTAAAAGCGGCCTAGC  
GGTACACTAGTGGGATTGTATGGAGTGGCATGGAGCCTAGGTGGAGCCTGACAGGACGCACGACCCGG  
CTAGCCCGTGCAGACGATGGGTGGCTCCTGTTGTCCACCGCGTACAAATGTTTGGGCCAAAGTCTTG  
TCAGCCTTGTTCGAACTAATTCCCAATTTTGTCACTTCGCACCCCATGATCGAGCCCTAACCCC  
TGCCCATCAGGCAATCCAATTAAGCTCGCATTGTCTGCCTTGTAGTTTGGCTCCTGCCCCTTTCGCG  
GTTCACTTGCACAAACACAAACAGCATTATATAAGGCTCGTCTCCTCCCTCCCAACCACTACACTT  
TTTTGCCCGTCTTCCCTTGCTAACACAAAAGTCAAGAACACAAACACCCCAACCCCTTACACA  
CAAGACATATCTACAGCAATGAAGCTCGCTACCGCCTTACTATTCTCACGGCCGTTCTGGCCCAACAG  
ACGGTGTGGGGCCAATGTGGCGGCAATTGGCTGGTTCGGTCCGACCAACTGTGCTCCTGGCTCGGCCTG  
TTCGACTCTGAACCCCTACTACGCTCAGTGTATCCCCGGAGCGACCACCATCACCACGTCTACTCGACC  
CCCTTACAGGACCCACTACCACCACGCGAGCGACCTCCACCTCCAGCTCTACTCCCCCTACATCCTCTGG  
TGTTTCGATTTGCTGGCGTGAACATCGCCGGTTTTCGACTTCGGATGCACGACTGACGGTACATGCGTGAC  
ATCCAAGGTCTATCCCCCGTTGAAAACTTACCAGGGTCTAACAATTATCCTGACGGCATTGGTTCAGAT  
GCAACACTTTGTCAACGAGGATGGCATGACCATCTTCCGACTCCCTGTCGGCTGGCAGTATCTAGTGA  
ACAATAACCTGGGCGGAAACCTTGCAGCACAAGCATCTCCAAGTACGATCAATTGGTGCAGGGATG  
CCTCAGTTTGGGTGCTTACTGCATCGTTGACATTCAAACTACGCTAGGTGGAACGGGGGAATCATCG  
GACAGGGTGGCCCCACTAACGCCAGTTCACAAGTCTGTGGTCCCAGCTCGCCTCTAAGTACGCATCT  
CAGTCCCAGGTGTGGTTTTGGAATCATGAATGAGCCCCATGACGTCAACATTAACACTTGGGCTGCCAC  
CGTACAGGAAGTCGTTACCGCCATTGTAACGCCGGAGCCACCTCGCAGTTCATCTCGCTGCCTGGAA  
ATGACTGGCAGTCTGCTGGTGTCTTTCATTTCCGATGGATCAGCAGCCGCTCTCAGCCAAGTACAGAAC  
CTGATGGATCTACAACCAACCTGATTTTCGACGTGCATAAGTACCTGGACTCGGATAACAGCGGAACC  
CACGCGGAGTGTACCACTAACAACATTGACGGTGCCTTTTCTCCTCTCGCAACGTGGCTCAGACAGAA

CAACAGACAGGCCATTCTGACTGAAACTGGTGGCGGCAACGTTCAATCATGTATCCAGGACATGTGCC  
AGCAGATTCAGTACCTGAATCAGAATAGTGACGTGTACCTTGGCTACGTGGGTTGGGGAGCAGGGTCC  
TTTGATTCTACCTACGTCCTGACCGAGACTCCGACATCCTCCGGCAACTCGTGGACTGATACATCTCTT  
GTTTCGTCATGCCTTGCCCGCAAGTGATAAAGCTTTGCGGCGAAACTCGATTCTCACCCCTGATAACTC  
GACTACCCCCCTTAACTTAAAATTCACTTACGACAAACAAACGTCTGATACCGACTACCCCCTCGACT  
TCTCGCAATCTCGACTTTCAATCAGAGGACCTCAAACAACCACTTTTTTCTTACGATTCTAATTATTAC  
CCATTCATTAATTTCCCGTGCGCTCGTCCAGCAATGTCCGAGAGCATCCTGCCTGTGTCTCTGGGCCCA  
TCCATTTAATTTGGGTCCATCCTCCCGGGCAGATTCCACAGTCCAGTTGTGCGCCGACTGGATGGTTAGT  
AGATCCGCCTTTTTTAGTTTGAACATGTTGCGAGTTGATACCTGAACATCAGAGTTTTAGCTTCTTGTA  
CTAATATACATTCCTTTTAGTGAGGTCCTGTACACTGTACACTGTATTATATTGTAGCGTTGTATTTTTG  
ATCCCTTGGTTTGTTCGTTATACGGTGTACAAGTATGTACGATCGGTACC,

**Supplementary Table S1. Primer sequences for real-time RT PCR.**

| <b>Target genes</b> | <b>Primer sequences</b>                                                 | <b>Amplicon size (bp)</b> |
|---------------------|-------------------------------------------------------------------------|---------------------------|
| Actin               | YI-Actin-1-F: TCCAGGCCGTCCTCTCCC<br>YI-Actin-1-R: GGCCAGCCATATCGAGTCGCA | 141                       |
| chimeric CBH I      | CBH I-2-F: TTCACCGCATCTAACCCACC<br>CBH I-2-R: GGTAGTTCCAGACGCACACA      | 159                       |
| CBH II              | CBH II-1-F: GACCCCACTCATGGAGCAAA<br>CBH II-1-R: TTTGTACTTGGCGACCCCTC    | 166                       |
| EG II               | EG II-3-F: TGACCATCTTCCGACTCCCT<br>EG II-3-R: ACGATGCAGTAAGCACCCAA      | 136                       |

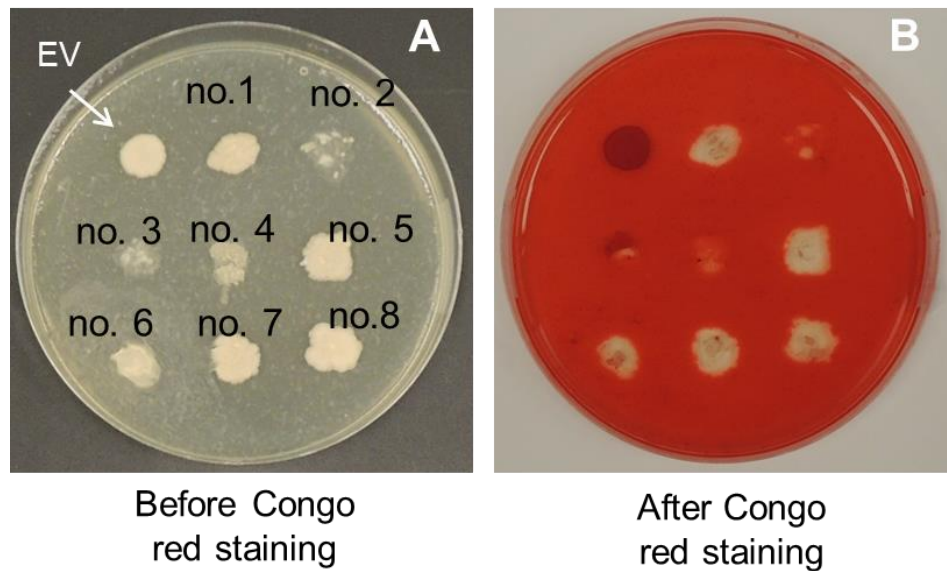

**Supplementary Figure S1. Growth of *Y. lipolytica* transformants co-expressing CBH I, CBH II, and EG II on PASC-YPD agar plate.** Eight transformants were grown on PASC-YPD agar plate (6 d) before (A) and after the Congo Red staining (B). EV, parent strain transformed with empty vector.

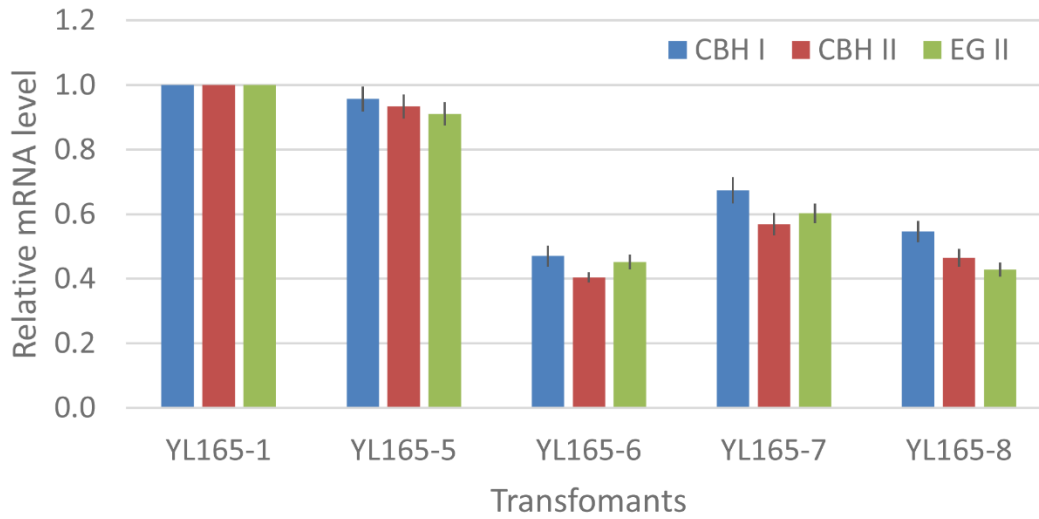

**Supplementary Figure S2.** Transcript levels relative to YL165-1 for CBH I-CBH II-EG II co-expressed in *Y. lipolytica* transformants YL165-1, -5, -6, -7, and -8. Data from three biological replicates, with error bars indicating the standard error of the mean (SEM).

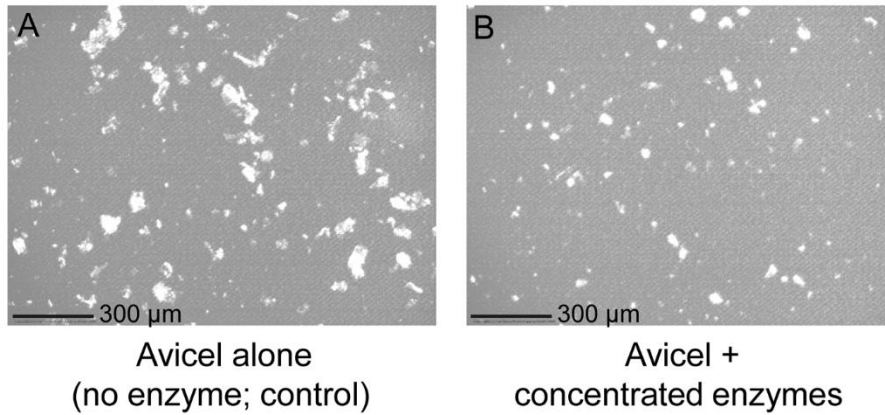

**Supplementary Figure S3. Effects of concentrated crude enzymes from transformant YL165-1 on the morphology of wet ball-dispersed Avicel particles.** Morphological comparison of wet ball-dispersed Avicel granules after 5 d incubation with no enzymes (**A**) versus with 35x concentrated crude enzymes of *Y. lipolytica* strain YL165-1 (**B**). The scale bar represents 300  $\mu$ m.



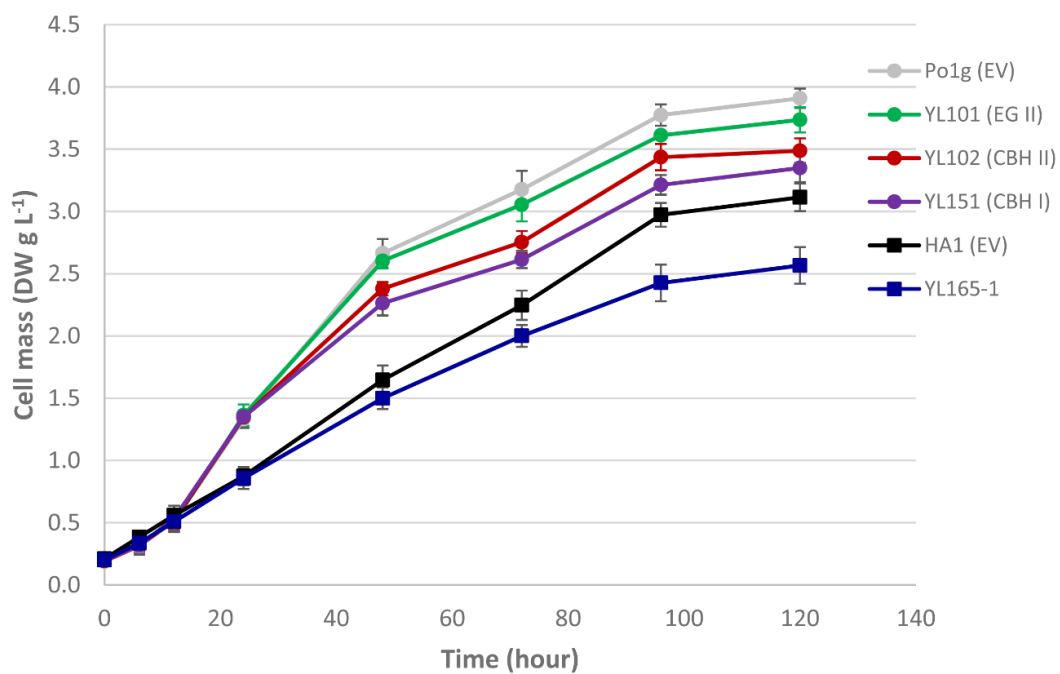

**Supplementary Figure S4:** The timeline profiling of cell mass weight of *Y. lipolytica* transformants expressing multiple cellulases and the control strain HA1 (EV) in shake flasks.

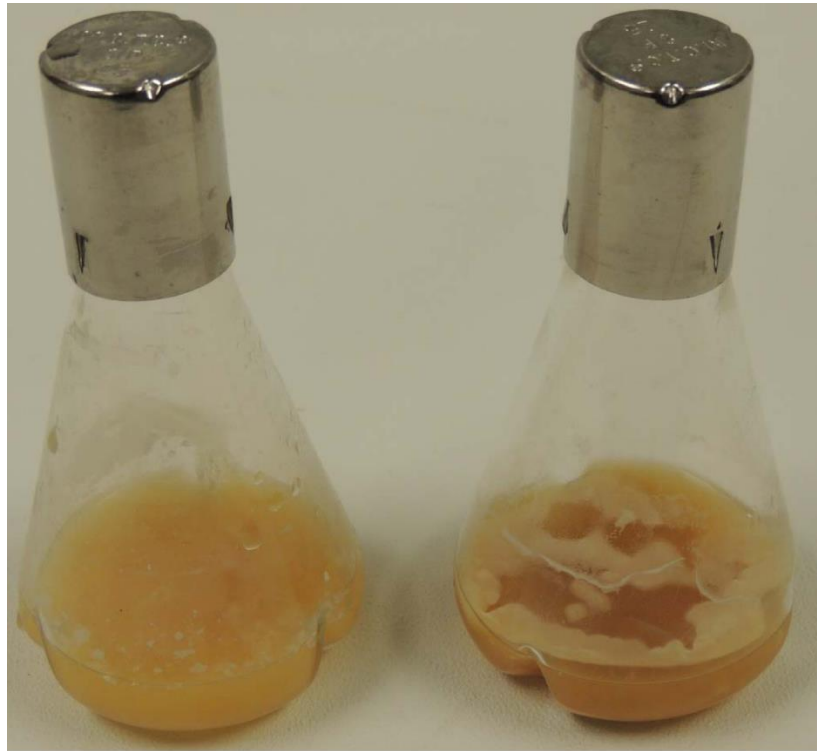

HA1 (EV)

YL165-1

**Supplementary Figure S5.** Floating cell mats of *Y. lipolytica* HA1 (EV) and transformant YL165-1. The cells were cultured in YPD-3% glucose medium in 250-mL baffled flasks at 200 rpm, 28°C for 6 d.
